# Supplementary material
Source: Royal Society of Chemistry journal article supplement (doi:10.1039/d6ja00046k)
Supplement: d6ja00046k1.pdf [file d6ja00046k1.pdf]

## Supplementary Materials

### Automated Online SPE–ICP-MS for Ultra-Trace Determination of Mercury in Freshwaters

**Alejandro R. López <sup>ab</sup>, Simone Mason <sup>b</sup>, Sandro Recchia <sup>b</sup>, Damiano Monticelli <sup>b</sup> and Davide Spanu <sup>\*b</sup>**

<sup>a</sup>University School for Advanced Studies IUSS Pavia, 27100 Pavia, Italy

<sup>b</sup>Department of Science and High Technology, University of Insubria, Via Valleggio 11, 22100 Como, Italy

\*Corresponding author:

Mail contact: [davide.spanu@uninsubria.it](mailto:davide.spanu@uninsubria.it)

Tel: +39-0312386428

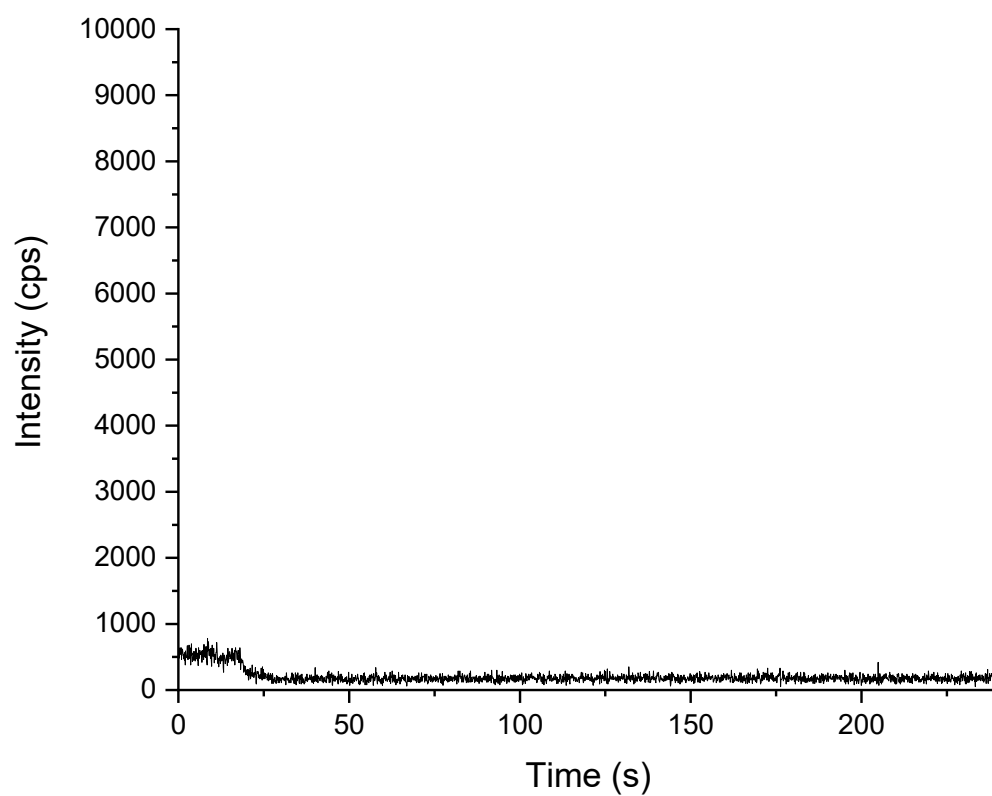

*Figure S1. Signal profile recorded during the accumulation step. A 5 mM thiourea (TU) solution spiked with 1  $\mu\text{g}/\text{kg}$  of both  $\text{Hg}(\text{II})$  and  $\text{MeHg}$  was fed through the column. The graph illustrates the trend of the analytical signal as a function of the accumulation time.*

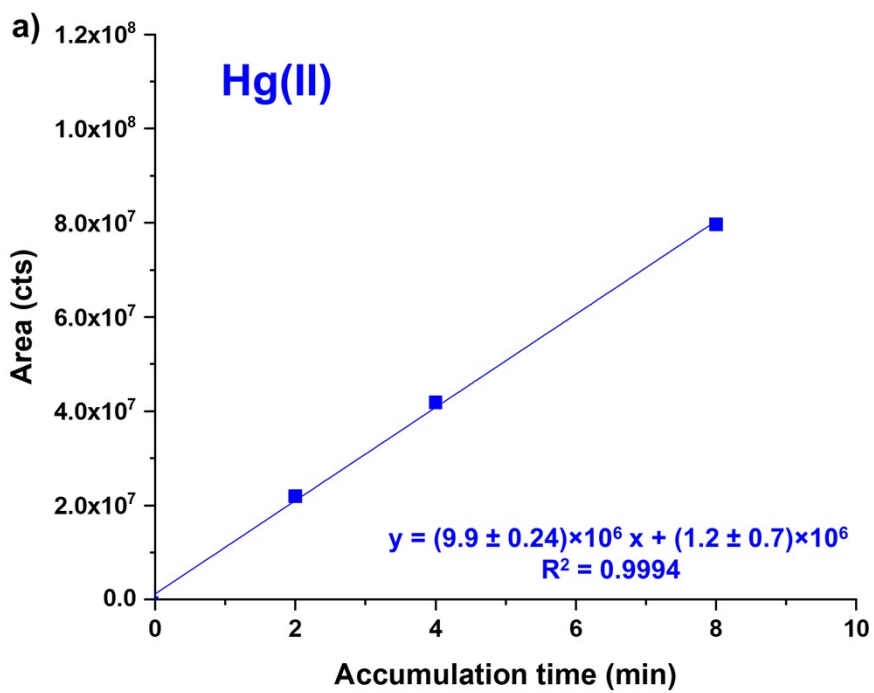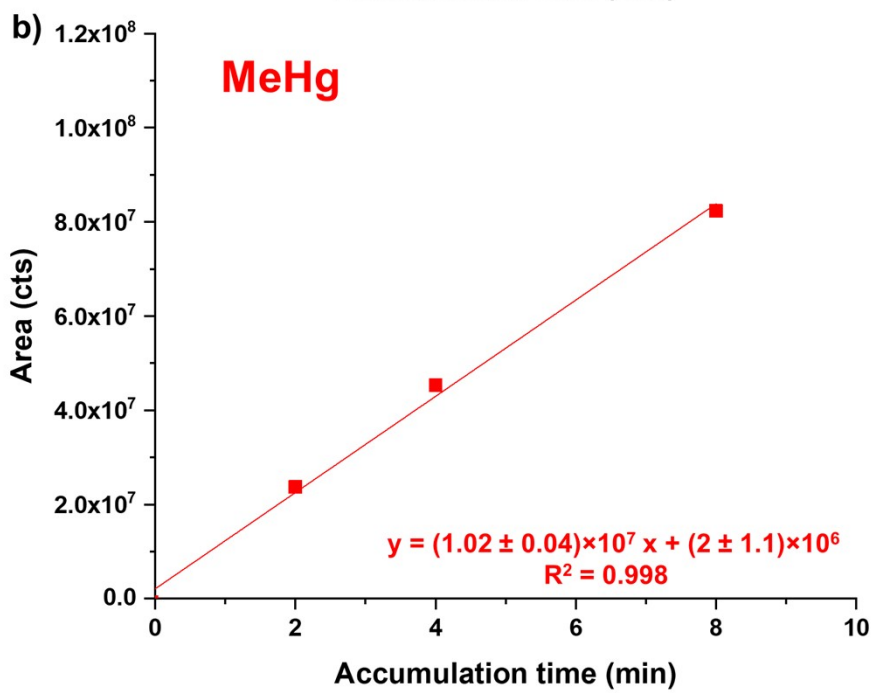

Figure S2. Effect of the accumulation time on Hg(II) (a) and MeHg (b) integrated peak areas.

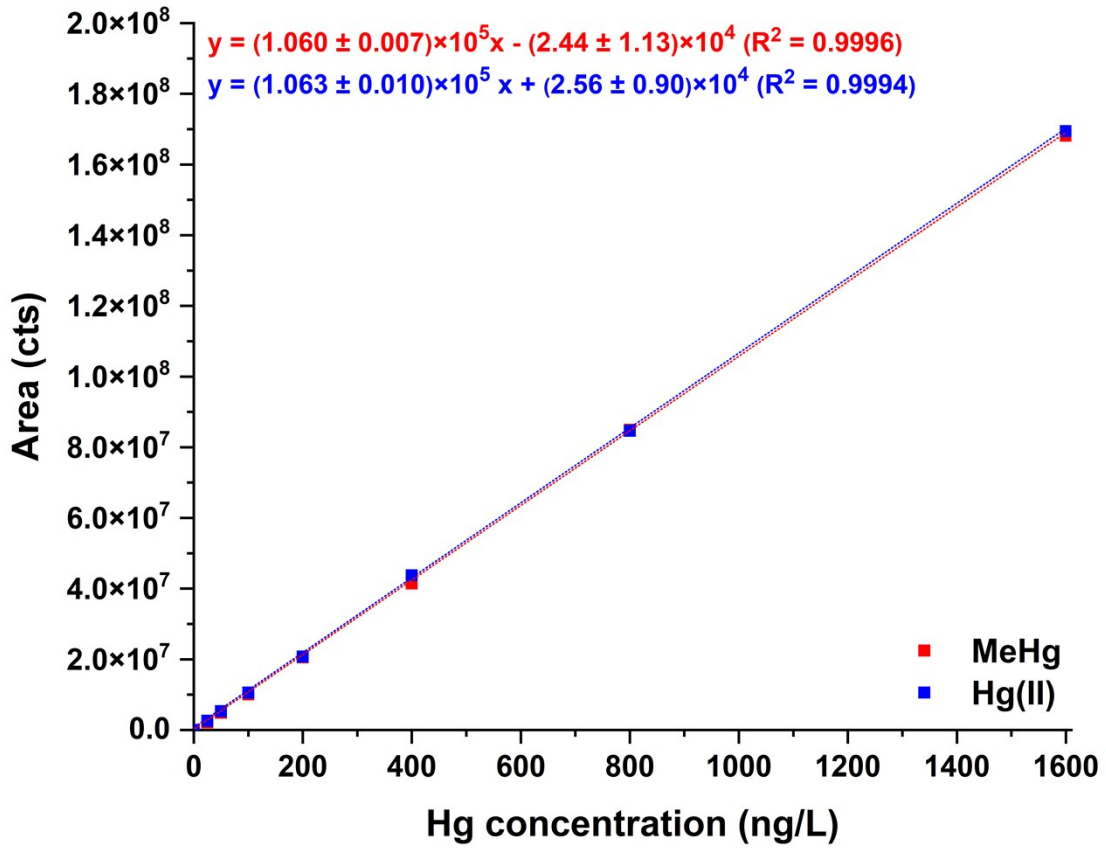

Figure S3. Calibration curves for Hg(II) (blue) and MeHg (red) showing peak area versus Hg concentration (ng/L). The accumulation time was set at 4 minutes.

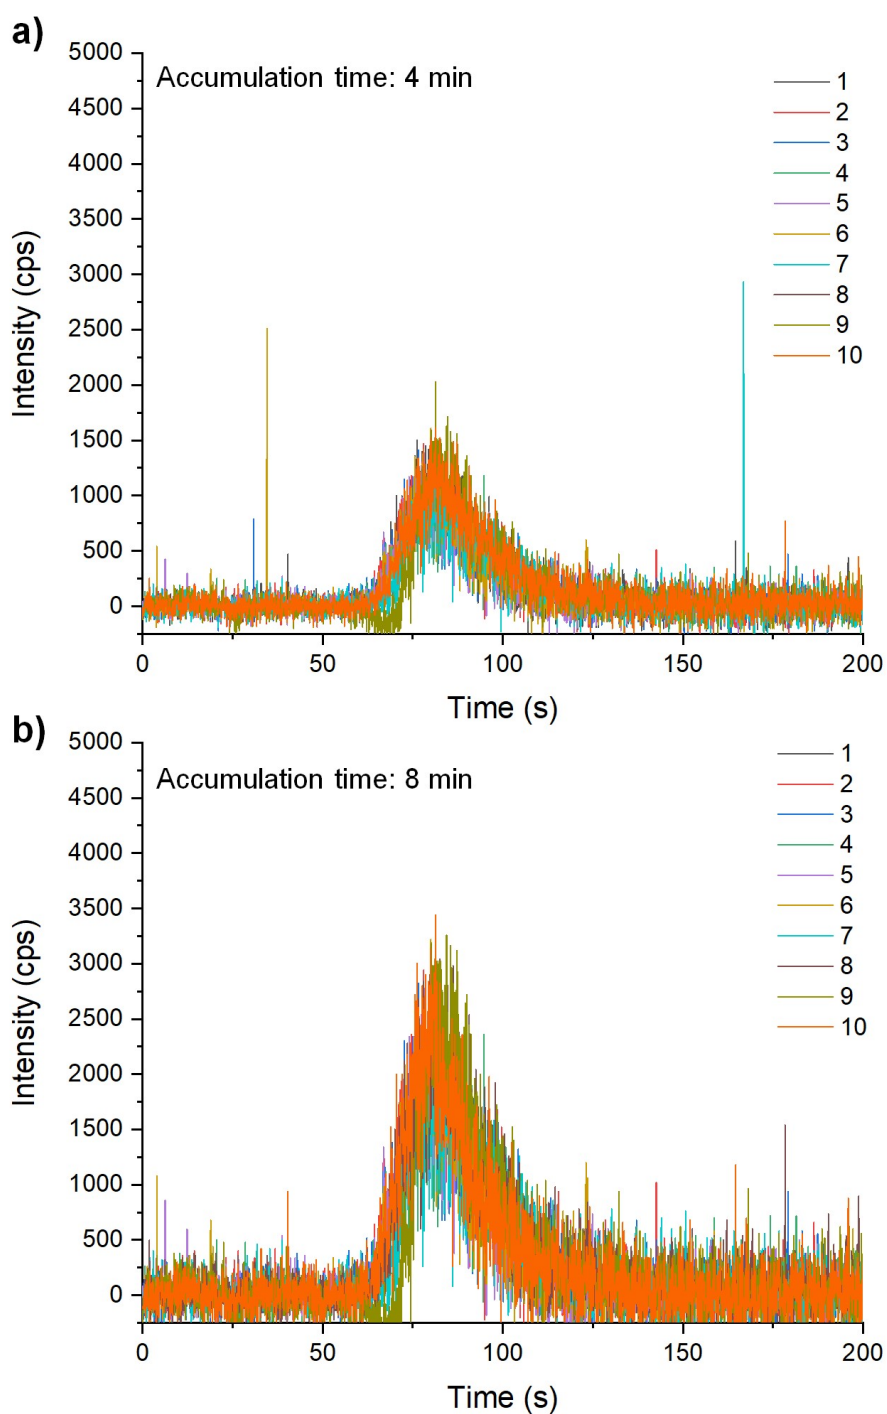

Figure S4. Analytical signals (after baseline subtraction) of the ten replicates of a 5 ng/kg Hg(II) standard solution for the determination of the limit of detection (LOD). a) Signals obtained with an accumulation time of 4 minutes. b) Signals obtained with an accumulation time of 8 minutes.

Table S1. Chemical composition of the mineral water samples (MW1, MW2, MW3) analyzed in this work.

| Parameter                                | MW1  | MW2  | MW3   |
|------------------------------------------|------|------|-------|
| Conductivity ( $\mu\text{S}/\text{cm}$ ) | 52   | 15   | 173.3 |
| Fixed residue (mg/L)                     | 34.9 | 14.4 | 123.6 |
| pH                                       | 7    | 6.9  | 7.4   |
| $\text{Ca}^{2+}$ (mg/L)                  | 10.8 | 1.0  | 37.0  |
| $\text{Na}^+$ (mg/L)                     | 0.58 | 0.90 | 1.1   |
| $\text{Mg}^{2+}$ (mg/L)                  | 0.39 | 0.37 | 6.7   |
| $\text{K}^+$ (mg/L)                      | 0.45 | 0.10 | 0.52  |
| $\text{HCO}_3^-$ (mg/L)                  | 32.3 | 4.9  | 138   |
| $\text{SO}_4^{2-}$ (mg/L)                | 1.5  | n.d. | 3.2   |
| $\text{Cl}^-$ (mg/L)                     | 0.55 | n.d. | 1.1   |
| $\text{NO}_3^-$ (mg/L)                   | 1    | 1.6  | 1.4   |

Table S2. Optimized online SPE-ICP-MS working parameters.

| Parameter                                                   | Value               |
|-------------------------------------------------------------|---------------------|
| RF Power                                                    | 1550 W              |
| Nebulizer gas flow                                          | 1.06 L/min          |
| Auxiliary gas flow                                          | 0.80 L/min          |
| Cooling gas flow                                            | 13.99 L/min         |
| Dwell time                                                  | 100 ms              |
| Monitored m/z Channels                                      | $^{202}\text{Hg}$   |
| <b>Step 1: Sample uptake and Accumulation of Hg Species</b> |                     |
| Sample solution composition                                 | TU 5 mM, HCl 500 mM |
| Sample flow rate                                            | 1.7 mL/min          |
| Duration (min)                                              | 2-8                 |
| <b>Step 2: Elution Hg Species</b>                           |                     |
| Eluent composition                                          | HCl 1 M             |
| Sample flow rate                                            | 1.7 mL/min          |
| Duration (min)                                              | 3                   |

Table S3. Results of spike-recovery experiments for total Hg determination. Reported concentrations correspond to the mean of three replicates ( $n = 3$ ), with uncertainties expressed as 95% confidence intervals calculated using the coverage factor  $t(0.95, 2 \text{ df}) = 4.303$ . Expected concentrations and the associated recovery percentages are also shown.

| Hg(II) spiked (ng/L) | MeHg spiked (ng/L) | Total Hg spiked (ng/L) | Total Hg measured (ng/L) | Recovery (%) |
|----------------------|--------------------|------------------------|--------------------------|--------------|
| 10                   | 10                 | 20                     | $21 \pm 2$               | $105 \pm 10$ |
| 30                   | 30                 | 60                     | $62 \pm 2$               | $103 \pm 3$  |
| 50                   | 50                 | 100                    | $96 \pm 4$               | $96 \pm 4$   |
| 10                   | 40                 | 60                     | $63 \pm 3$               | $105 \pm 5$  |

|    |    |    |            |             |
|----|----|----|------------|-------------|
| 50 | 10 | 60 | $65 \pm 5$ | $108 \pm 8$ |
|----|----|----|------------|-------------|

Table S4. Comparison of analytical performance for total mercury determination using different instrumental approaches, applied to water samples.

| Analytical method                            | LOD (ng/L)                                     | Linearity Range (ng/L) | References |
|----------------------------------------------|------------------------------------------------|------------------------|------------|
| CV-ICP-MS                                    | 0.8                                            | 1.9-50                 | 1          |
| FI-CV-AAS with ionic liquid extraction       | 2.3                                            | 10-2'500               | 2          |
| ICP-MS                                       | 7.9                                            | 50-5'000               | 3          |
| TDA-AAS                                      | 350                                            | 350-130'000            | 3          |
| Offline SPE-ICP-MS                           | 0.05 (MeHg)<br>0.08 (iHg)                      | 10-500                 | 4          |
| Online SPE-HPLC-ICP-MS (Not fully automated) | 0.001 (Hg(II))<br>0.002 (MeHg)<br>0.002 (EtHg) | 0.1-100                | 5          |
| Online SPE-HPLC-ICP-MS                       | 0.78 (iHg)<br>0.63 (MeHg)<br>0.49 (EtHg)       | 5-500                  | 6          |
| Online SPE-HPLC-ICP-MS                       | 17 (MeHg)<br>15 (iHg)                          | Up to 100'000          | 7          |
| Online SPE-HPLC-ICP-MS (Not fully automated) | 0.005 (iHg)<br>0.006 (MeHg)<br>0.009 (EtHg)    | 0.05-50                | 8          |

|                    |      |             |           |
|--------------------|------|-------------|-----------|
| Offline SPE-ICP-MS | 0.52 | 2-5000      | 9         |
| Online SPE-ICP-MS  | 0.93 | Up to 1'600 | This work |

**CV-ICP-MS = Cold Vapor Inductively Coupled Plasma Mass Spectrometry, FI-CV-AAS = Flow Injection Cold Vapor Atomic Absorption Spectrometry, TDA-AAS = Thermal Decomposition Atomic Absorption Spectrometry.**

### References

- 1 R. Sánchez, J. Snell, A. Held and H. Emons, *Anal. Bioanal. Chem.*, 2015, 407, 6569–6574.
- 2 E. M. Martinis, P. Bertón, R. A. Olsina, J. C. Altamirano and R. G. Wuilloud, *J. Hazard. Mater.*, 2009, 167, 475–481.
- 3 C. S. Provete, B. M. Dalfior, R. Mantovaneli, M. T. W. D. Carneiro and G. P. Brandão, *ACS Omega*, 2024, 9, 49229–49238.
- 4 S. Kulomäki, E. Lahtinen, S. Perämäki and A. Väisänen, *Talanta*, 2022, 240, 123163.
- 5 Y. Song, Q. Ma, H. Cheng, J. Liu and Y. Wang, *Anal. Chim. Acta*, 2021, 1157, 338388.
- 6 X. Jia, J. Zhao, H. Ren, J. Wang, Z. Hong and X. Zhang, *Talanta*, 2019, 196, 592–599.
- 7 A. Londonio, P. E. Hasuoka, P. Pacheco, R. A. Gil and P. Smichowski, *J. Anal. At. Spectrom.*, 2018, 33, 1737–1744.
- 8 S. Yang, D. Zhang, H. Cheng, Y. Wang and J. Liu, *Anal. Chim. Acta*, 2019, 1074, 54–61.
- 9 C. Peng, M. He, B. Chen, L. Huang and B. Hu, *Analyst*, 2017, 142, 4570–4579.
